# Supplementary material for: Heterometallic complexes with cube-type [MTi3N4] cores containing Group 10 metals in a variety of oxidation states
Source: Royal Society of Chemistry journal article supplement (doi:10.1039/c5dt01200g), 2015-01-01
Supplement: c5dt01200g1.pdf [file c5dt01200g1.pdf]

## **Electronic Supplementary Information for:**

**Heterometallic complexes with cube-type [MTi<sub>3</sub>N<sub>4</sub>] cores containing**

**Group 10 metals in a variety of oxidation states**

Noelia Martínez-Espada, Miguel Mena, Adrián Pérez-Redondo, Víctor Varela-Izquierdo

and Carlos Yélamos\*

*Departamento de Química Orgánica y Química Inorgánica, Universidad de Alcalá. 28871*

*Alcalá de Henares-Madrid (Spain). FAX: (+34) 91-8854683. E-mail:*

*carlos.yelamos@uah.es*

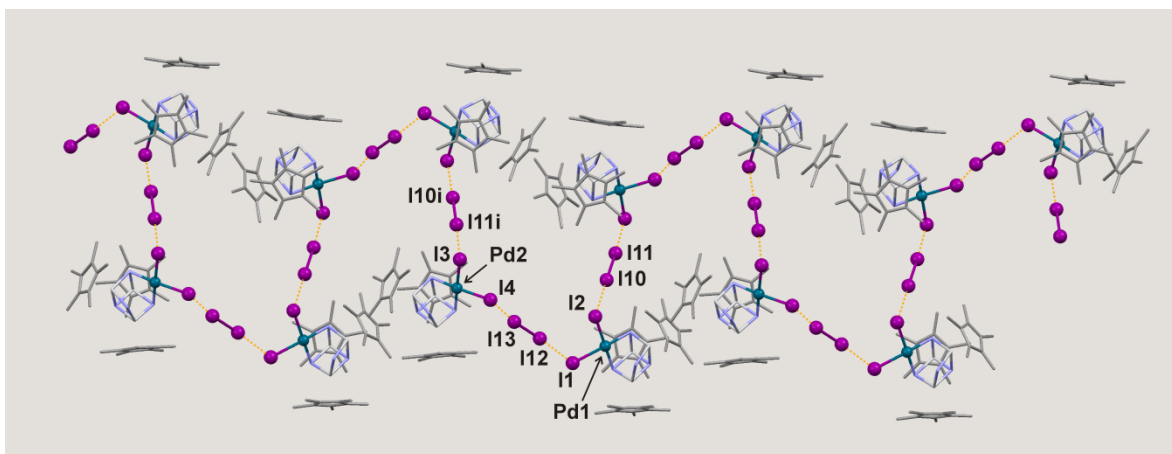

**Fig. S1.** Intermolecular halogen bonds in complex **8**.

**Table S1.** Halogen bonds in compound **8**.

| Halogen bond                                   | I $\cdots$ I/ $\text{\AA}$ | Pd-I $\cdots$ I/ $^\circ$ | I $\cdots$ I-I/ $^\circ$ | R <sub>II</sub> <sup>a</sup> |
|------------------------------------------------|----------------------------|---------------------------|--------------------------|------------------------------|
| Pd(1)-I(1) $\cdots$ I(12)-I(13)                | 3.411(1)                   | 116.5(1)                  | 172.4(1)                 | 0.861                        |
| Pd(1)-I(2) $\cdots$ I(10)-I(11)                | 3.375(1)                   | 102.6(1)                  | 172.1(1)                 | 0.852                        |
| Pd(2)-I(3) $\cdots$ I(11)i-I(10)i <sup>b</sup> | 3.374(1)                   | 97.3(1)                   | 176.0(1)                 | 0.852                        |
| Pd(2)-I(4) $\cdots$ I(13)-I(12)                | 3.391(1)                   | 112.5(1)                  | 169.1(1)                 | 0.856                        |

<sup>a</sup> The normalized distance R<sub>II</sub> involves normalization relative to the sum of van der Waals radii of the two iodine atoms, R<sub>II</sub> =  $d(\text{I}\cdots\text{I})/2r_{\text{I}}$ , where  $r_{\text{I}}$  is the van der Waals radius of iodine (1.98  $\text{\AA}$ ).<sup>b</sup> Symmetry code: (i)  $1 - x, -1/2 + y, 1/2 - z$ .

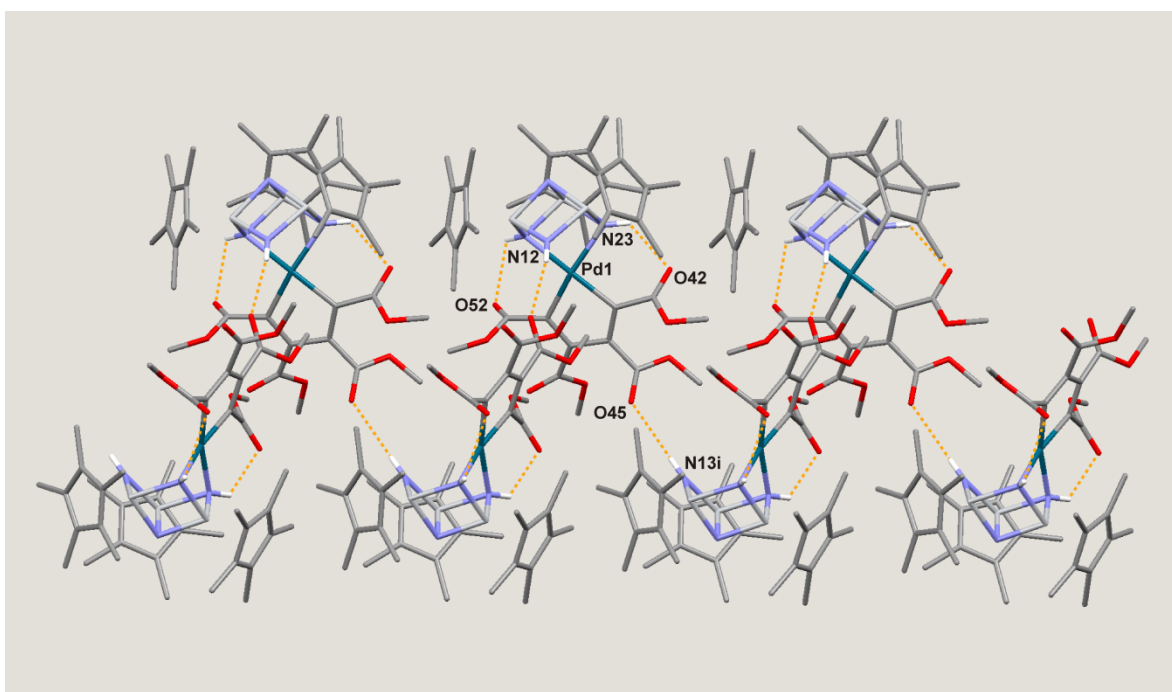

**Fig. S2.** Intra- and intermolecular hydrogen bonds in complex **9**. Lengths (Å) N(23)⋯O(42) 2.920(1), N(12)⋯O(52) 3.335(1), N(13)⋯O(45)i 3.423(1). Symmetry transformation: (i)  $3/2 - x, -1/2 + y, 1/2 - z$ .
